# Supplementary material
Source: Springer Nature journal article supplement (https://www.springermedizin.de/resource/supplementary/12958_2010_811_MOESM4_ESM.pdf/9568904)

## Calf follicle

## Cow follicle

antisense

sense

antisense

sense

BMP15

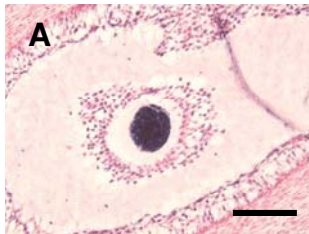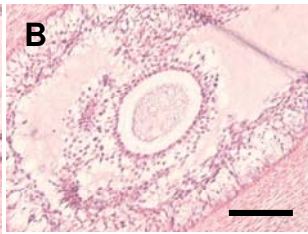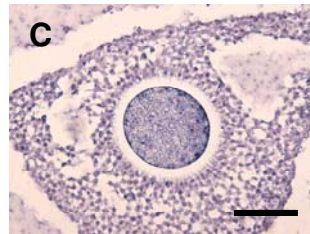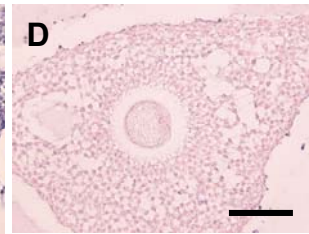

GDF9

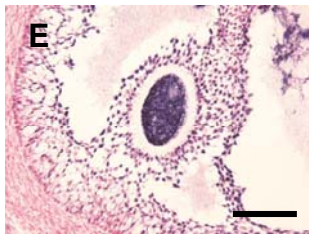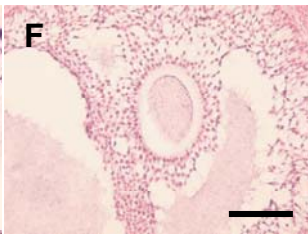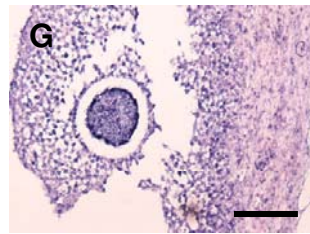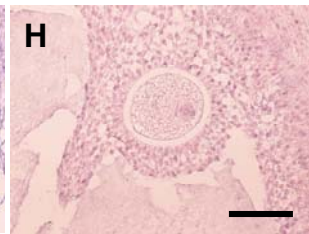

Supplement: MOESM4 [file 9568904]
